# Supplementary material for: Facile Hg2+ detection in water using fluorescent self-assembled monolayers of a rhodamine-based turn-on chemodosimeter formed via a “click” reaction
Source: Royal Society of Chemistry journal article supplement (doi:10.1039/c1jm11319d), 2011-01-01

# Facile Hg<sup>2+</sup> detection in water using fluorescent self-assembled monolayers of a rhodamine-based turn-on chemodosimeter formed via a “click” reaction

Hua Lu,<sup>a, b</sup> Shulin Qi,<sup>a</sup> John Mack,<sup>d</sup> Zhifang Li,<sup>b</sup> Jianping Lei,<sup>\*c</sup> Nagao Kobayashi<sup>\*d</sup> and Zhen Shen<sup>\*a, b</sup>

## Electronic Supplementary Information

### II. Supplementary Figures

Figure S1 (Fluorescence response of **1 2 3** for Hg<sup>2+</sup>).....S2

Figure S2 (Fitted C<sub>1s</sub> XPS spectrum).....S3

III. <sup>1</sup>H NMR spectra .....S4-S6

## II. Supplementary data

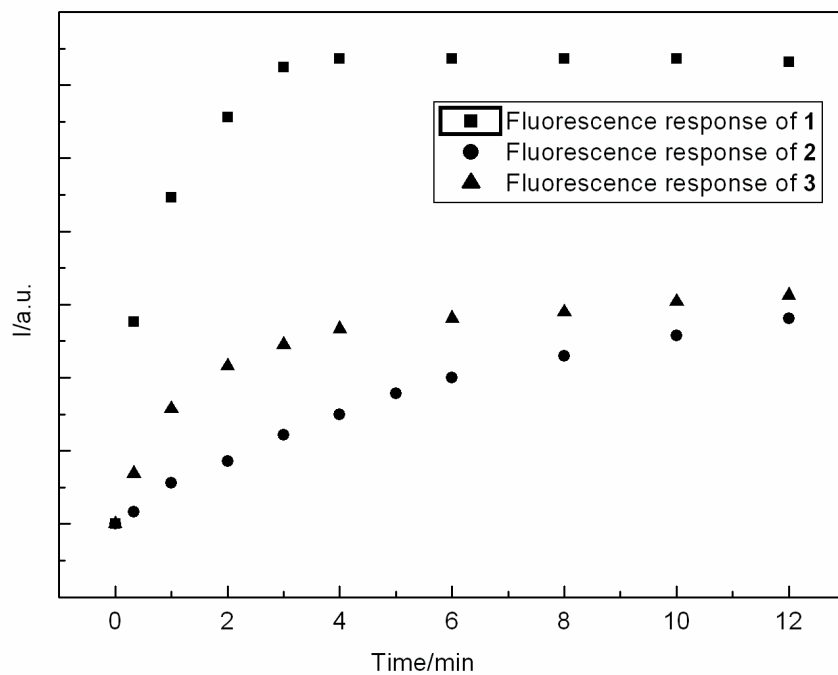

**Figure S1.** The fluorescence response of compounds **1**, **2**, **3** (10  $\mu\text{M}$ ) to 10 eq of  $\text{Hg}^{2+}$  at 583 nm in  $\text{CH}_3\text{CN}$  over time.

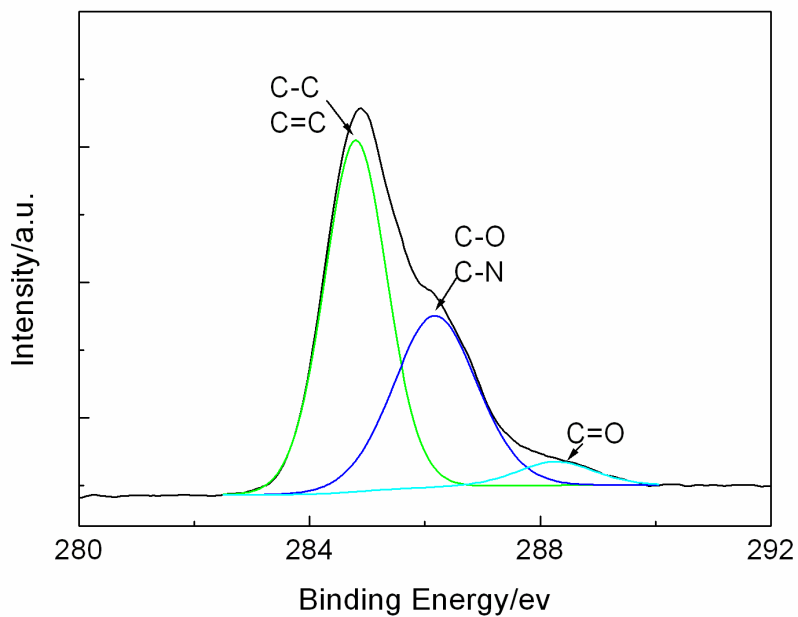

**Figure S2.** Fitted  $C_{1s}$  XPS spectrum of SAM-1.

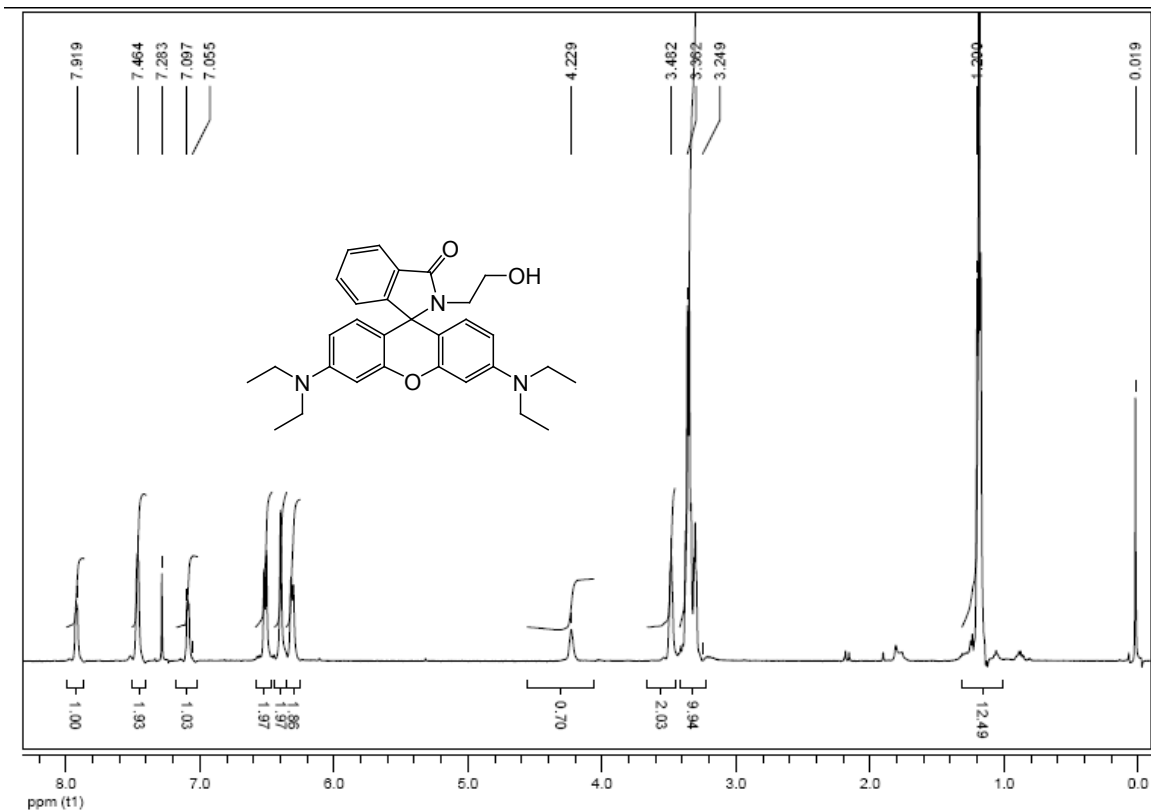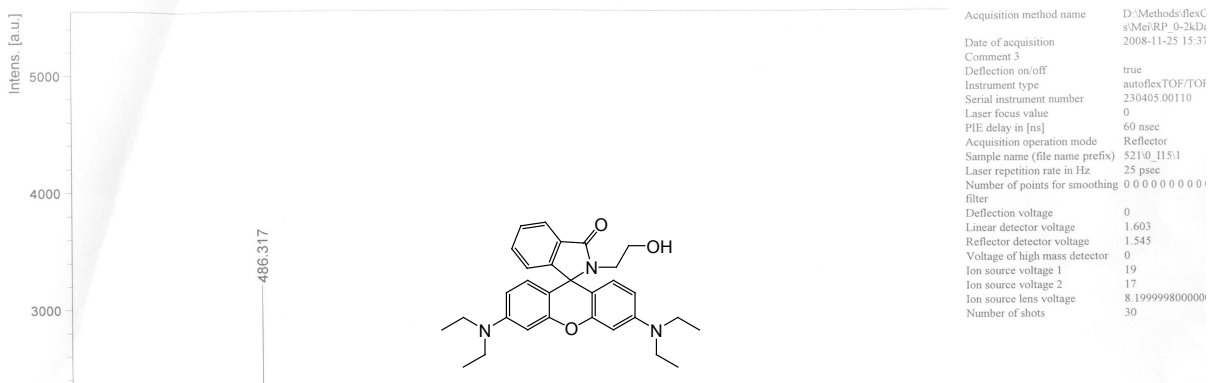

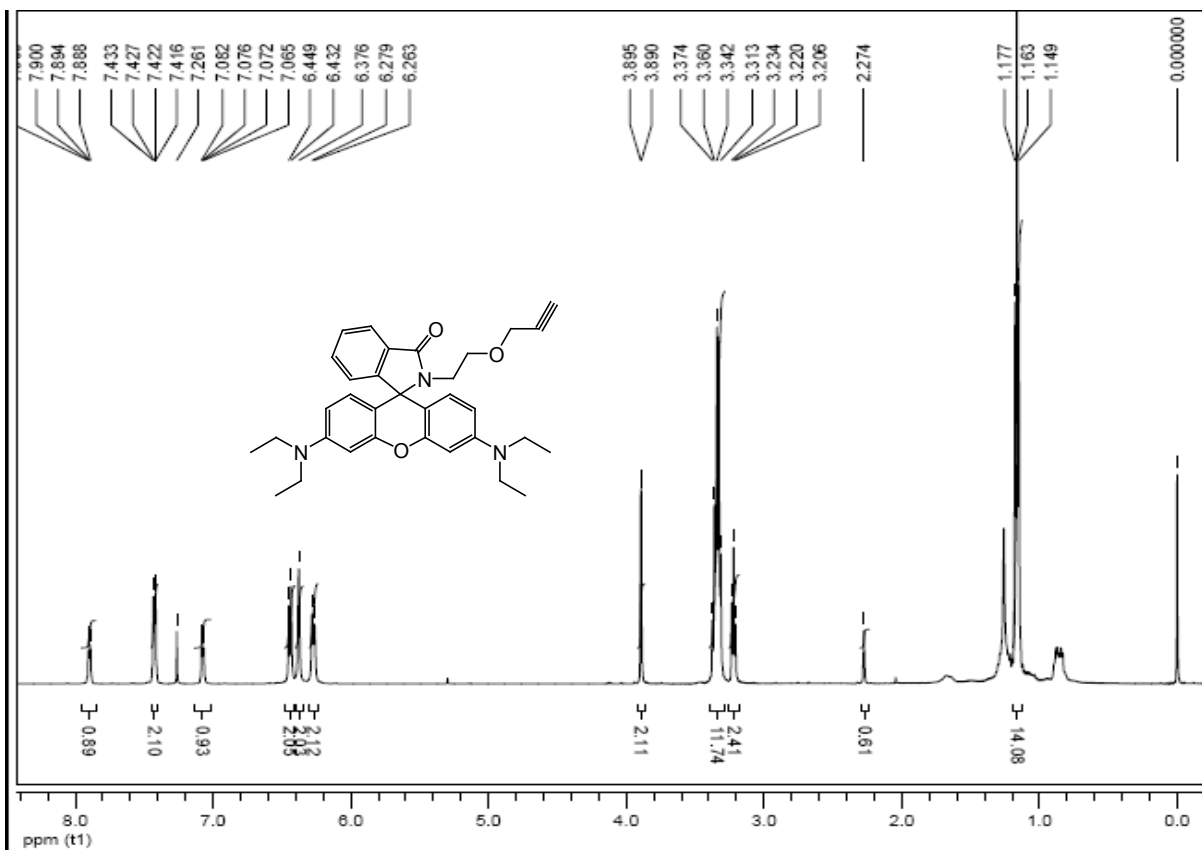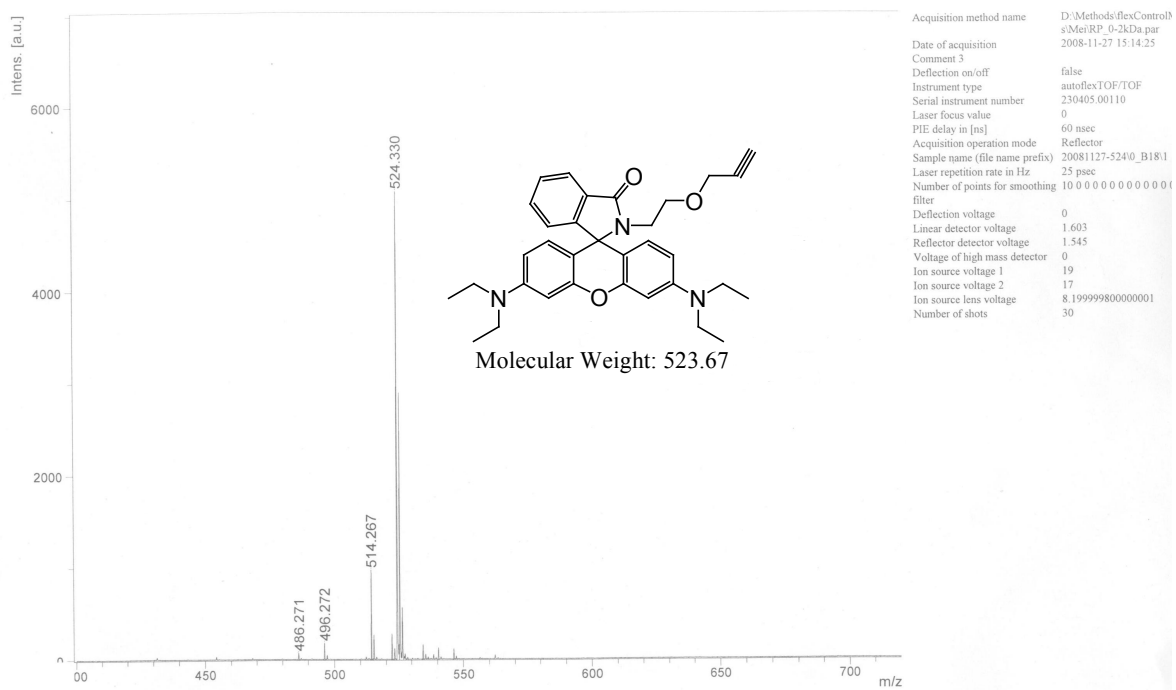

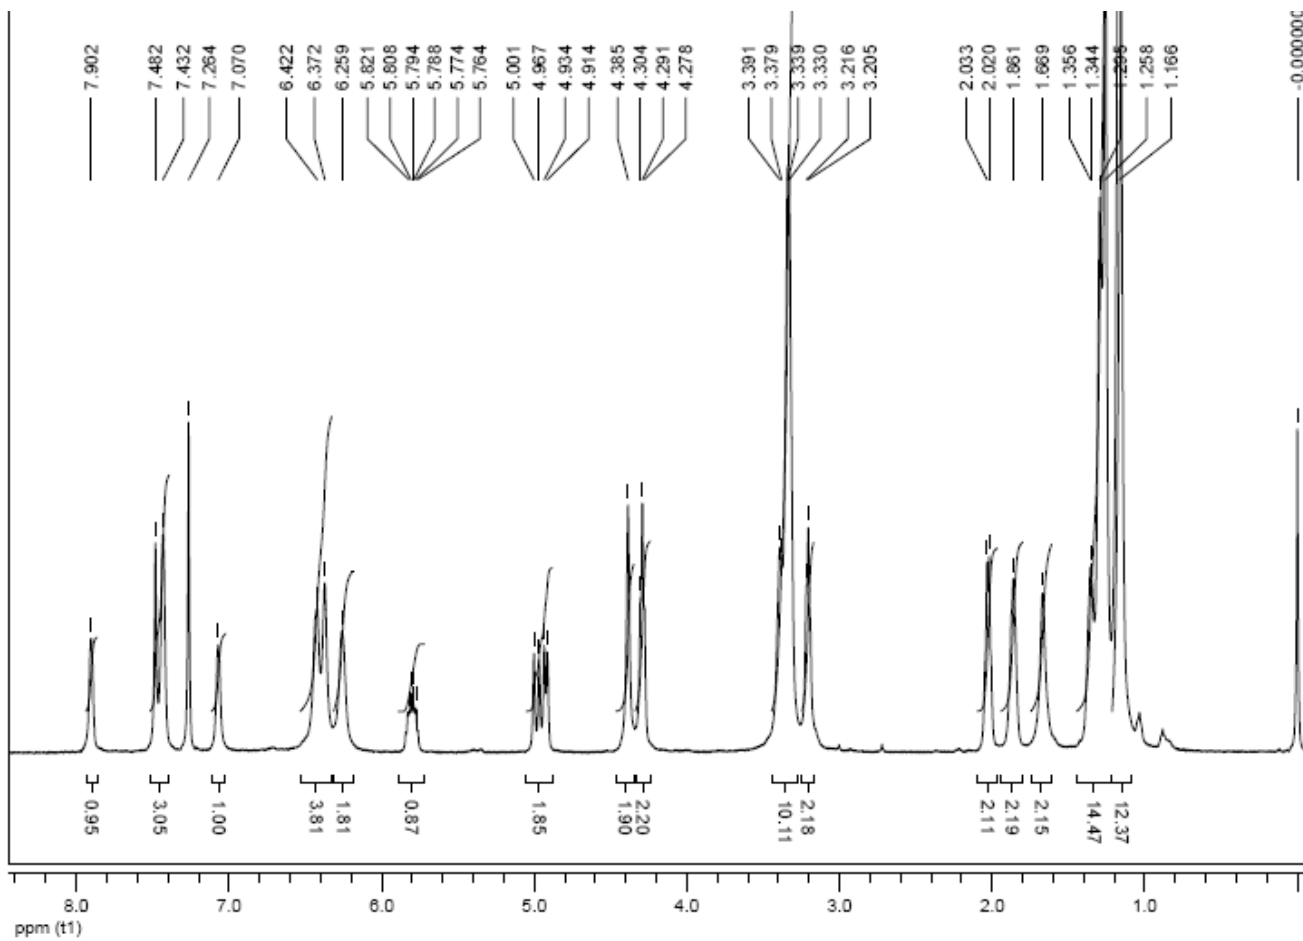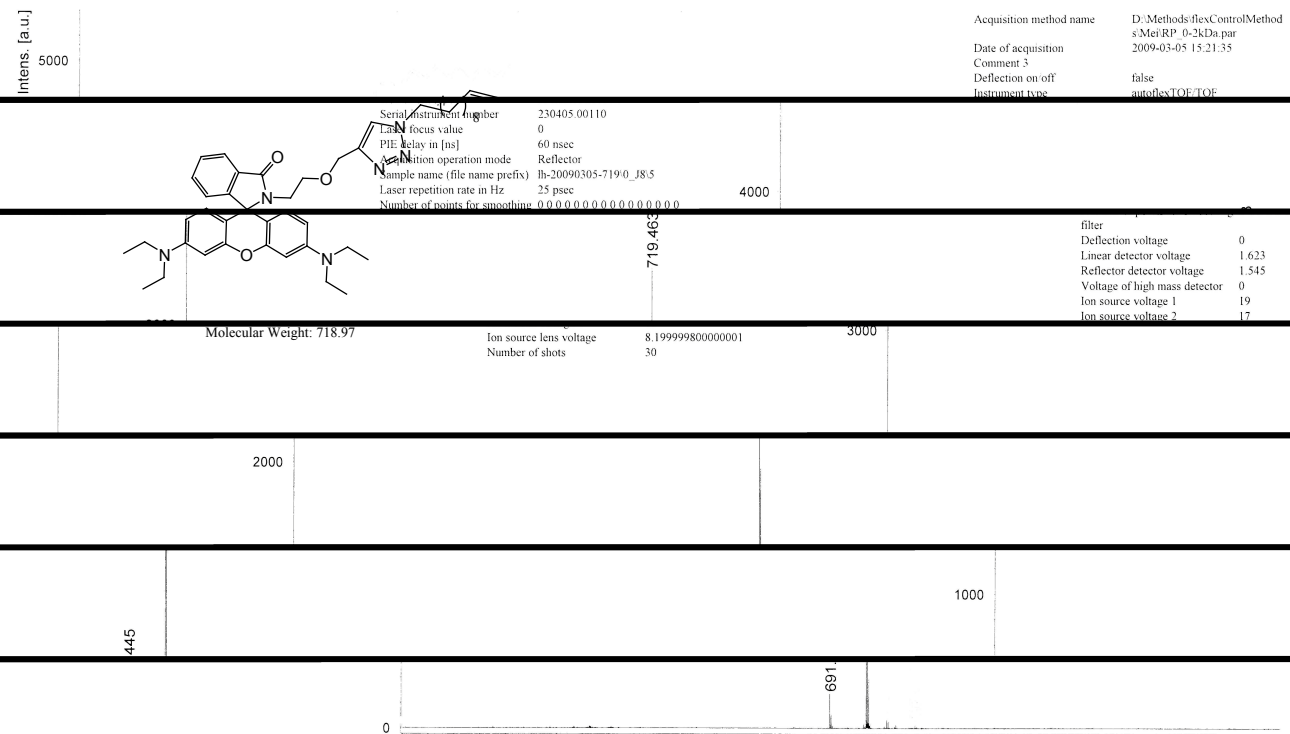

Supplement: c1jm11319d.pdf [file c1jm11319d.pdf]
